# Supplementary material
Source: PubMed Central journal article supplement (PMC7904582)
Supplement: NIHMS1659081-supplement-Supplemental_Publication_Material.pdf [file NIHMS1659081-supplement-Supplemental_Publication_Material.pdf]

## SUPPLEMENTAL MATERIALS

### **Apoptotic ablation of platelets reduces atherosclerosis in mice with diabetes**

Man K.S. Lee<sup>1,2,5\*</sup>, Michael J. Kraakman<sup>1\*</sup>, Dragana Dragoljevic<sup>1,5</sup>, Nordin M.J. Hanssen<sup>1,2,7,8</sup>, Michelle C. Flynn<sup>1,3</sup>, Annas Al-Sharea<sup>1</sup>, Gopalkrishna Sreejit<sup>9</sup>, Camilla Bertuzo-Veiga<sup>1,6</sup>, Olivia D. Cooney<sup>1,2</sup>, Fatima Baig<sup>1</sup>, Elizabeth Morriss<sup>1</sup>, Mark E. Cooper<sup>2</sup>, Emma C. Josefsson<sup>10,11</sup>, Benjamin T. Kile<sup>4,12</sup>, Prabhakara R. Nagareddy<sup>9\*</sup>, and Andrew J. Murphy<sup>1,3,5,6\*</sup>

<sup>1</sup>Haematopoiesis and Leukocyte Biology, Baker Heart and Diabetes Institute, Melbourne 3004, Australia

<sup>2</sup>Department of Diabetes, <sup>3</sup>Department of Immunology, <sup>4</sup>Monash Biomedicine Discovery Institute Monash University, Melbourne, Australia

<sup>5</sup>Department of Cardiometabolic Health, <sup>6</sup>Department of Physiology, University of Melbourne, Melbourne, Australia

<sup>7</sup>Department of internal Medicine, CARIM, School of cardiovascular diseases, Maastricht University, Maastricht, The Netherlands

<sup>8</sup>Amsterdam Diabetes Centrum, Internal and vascular medicine, Amsterdam UMC, AMC, The Netherlands

<sup>9</sup>Division of Cardiac Surgery, Dept. of Surgery, Ohio State University, Columbus, Ohio, USA

<sup>10</sup>The Walter and Eliza Hall Institute of Medical Research, Parkville, Australia

<sup>11</sup>Department of Medical Biology; University of Melbourne; Melbourne, VIC, Australia

<sup>12</sup>Faculty of Health and Medical Sciences, University of Adelaide, Adelaide, Australia

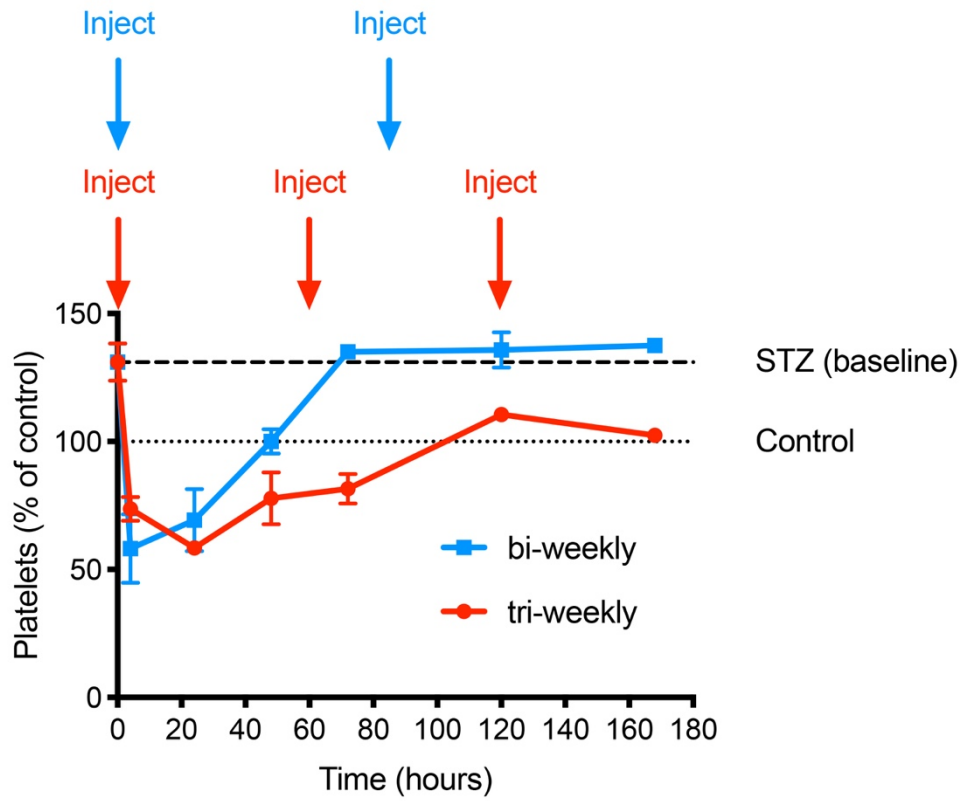

**Supplementary Figure I. Dose frequency of ABT-737.** Diabetic (STZ) *ApoE*<sup>-/-</sup> mice were treated with ABT-737 (30mg/kg i.p.) tri- or bi-weekly and platelets were calculated as a percentage of control (non-diabetic *ApoE*<sup>-/-</sup> mice). n=3/group.

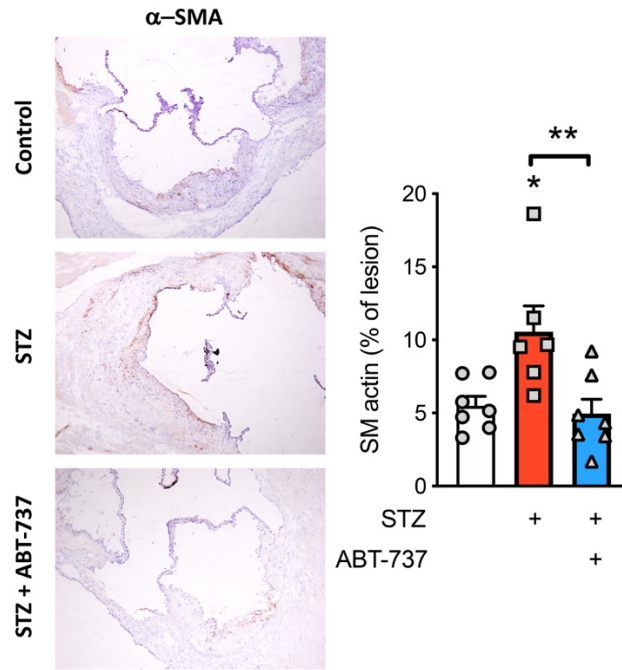

**Supplementary Figure II. Atherosclerotic plaque smooth muscle cells.** Atherosclerotic plaques were assessed in the aortic sinus for smooth muscle cell content. **A)** Representative images of and **B)** quantification of smooth muscle cell  $\alpha$ -actin. Data are presented mean  $\pm$  SEM and analyzed using a one-way ANOVA followed by a Dunnett's multiple comparisons test, biological replicates, n=7, 6, 7/group; \*p<0.05, \*\*p<0.01 *c.f.* control, or as indicated.

## Major Resources Table

### Animals (in vivo studies)

| Species | Vendor or Source   | Background Strain                                   | Sex |
|---------|--------------------|-----------------------------------------------------|-----|
| Mouse   | In-house generated | <i>Ldlr</i> <sup>+/-</sup> (C57Bl/6J background)    | M   |
| Mouse   | Jax stock #002052  | <i>ApoE</i> <sup>-/-</sup> (C57Bl/6J background)    | M   |
| Mouse   | In-house generated | <i>Bcl-x</i> <sup>PLT20</sup> (C57Bl/6J background) | M   |

### Genetically Modified Animals – Generating *Ldlr*<sup>+/-</sup> mice

|                 | Species | Vendor or Source  | Background Strain                                |
|-----------------|---------|-------------------|--------------------------------------------------|
| Parent - Male   | Mouse   | Jax stock #002207 | <i>Ldlr</i> <sup>-/-</sup> (C57Bl/6J background) |
| Parent - Female | Mouse   | Jax stock #000664 | C57Bl/6J                                         |

### Antibodies

| Target antigen | Vendor or Source | Catalog #  | Working concentration |
|----------------|------------------|------------|-----------------------|
| CD45R          | Biolegend        | 103205     | 1:400                 |
| CD19           | Biolegend        | 152403     | 1:400                 |
| CD11b          | Biolegend        | 101211     | 1:400                 |
| CD3e           | eBioscience      | 11-0031-82 | 1:400                 |
| TER-119        | Biolegend        | 116215     | 1:400                 |
| CD2            | Biolegend        | 100105     | 1:400                 |
| CD8a           | Invitrogen       | 11-0081-85 | 1:400                 |
| CD4            | eBioscience      | 11-0042-85 | 1:400                 |
| Ly6-C/G        | Biolegend        | 553127     | 1:400                 |
| Sca1           | Biolegend        | 108120     | 1:400                 |
| cKit           | Biolegend        | 105826     | 1:400                 |
| CD34           | Biolegend        | 119309     | 1:400                 |
| FcyRII/III     | BD Biosciences   | 560540     | 1:400                 |
| CD45           | Biolegend        | 103126     | 1:400                 |
| CD115          | eBioscience      | 12-1152-82 | 1:400                 |
| Gr1            | BD Bioscience    | 553127     | 1:400                 |
| CD41           | Invitrogen       | 17-0411-82 | 1:400                 |

### Other

| Description | Source / Repository |
|-------------|---------------------|
| ABT-737     | Abbvie              |
